# Supplementary material
Source: publisher site journal article supplement (https://www.dovepress.com/article/343452)
Supplement: Supplementary file 1 [file get_supplementary_file.php]

Table S1. The raw and transformed score of all participants.

| ID | grade | gender | raw score | transformed score |
| --- | --- | --- | --- | --- |
| 49 | 7.00 | female | 251.50 | 492.38 |
| 50 | 7.00 | male | 291.00 | 496.35 |
| 51 | 7.00 | male | 268.00 | 494.04 |
| 52 | 7.00 | male | 392.00 | 506.48 |
| 53 | 7.00 | female | 377.50 | 505.03 |
| 54 | 7.00 | female | 375.50 | 504.83 |
| 55 | 7.00 | male | 376.50 | 504.93 |
| 56 | 7.00 | female | 180.00 | 485.20 |
| 57 | 7.00 | male | 354.50 | 502.72 |
| 58 | 7.00 | male | 168.50 | 484.05 |
| 59 | 7.00 | male | 175.00 | 484.70 |
| 60 | 7.00 | female | 256.00 | 492.83 |
| 62 | 7.00 | male | 222.50 | 489.47 |
| 64 | 7.00 | male | 220.50 | 489.27 |
| 65 | 7.00 | male | 252.00 | 492.43 |
| 66 | 7.00 | female | 231.50 | 490.37 |
| 67 | 7.00 | female | 303.50 | 497.60 |
| 68 | 7.00 | male | 174.50 | 484.65 |
| 70 | 7.00 | male | 503.50 | 517.68 |
| 71 | 7.00 | female | 366.00 | 503.87 |
| 72 | 7.00 | male | 470.00 | 514.31 |
| 73 | 7.00 | male | 369.50 | 504.23 |
| 75 | 7.00 | female | 433.50 | 510.65 |
| 76 | 7.00 | female | 409.50 | 508.24 |
| 77 | 7.00 | male | 372.00 | 504.48 |
| 78 | 7.00 | male | 424.50 | 509.75 |
| 79 | 7.00 | female | 410.00 | 508.29 |
| 80 | 7.00 | male | 506.00 | 517.93 |
| 81 | 7.00 | female | 448.50 | 512.15 |
| 82 | 7.00 | female | 388.00 | 506.08 |
| 83 | 7.00 | female | 418.50 | 509.14 |
| 84 | 7.00 | male | 478.00 | 515.12 |
| 85 | 7.00 | female | 407.50 | 508.04 |
| 86 | 7.00 | male | Missing | 507.28 |
| 87 | 7.00 | female | 496.50 | 516.97 |
| 88 | 7.00 | female | 446.50 | 511.95 |
| 89 | 7.00 | female | 501.50 | 517.47 |
| 91 | 7.00 | female | 301.50 | 497.40 |
| 92 | 7.00 | male | 435.50 | 510.85 |
| 93 | 7.00 | female | 472.50 | 514.56 |
| 94 | 7.00 | female | 436.50 | 510.95 |
| 95 | 7.00 | female | 409.50 | 508.24 |
| 96 | 7.00 | female | 388.00 | 506.08 |
| 97 | 7.00 | male | 492.00 | 516.52 |
| 98 | 7.00 | male | 433.00 | 510.60 |
| 99 | 7.00 | female | 424.00 | 509.70 |
| 100 | 7.00 | female | 505.00 | 517.83 |
| 102 | 7.00 | female | 413.00 | 508.59 |
| 103 | 7.00 | male | 450.00 | 512.31 |
| 104 | 7.00 | female | 465.00 | 513.81 |
| 105 | 7.00 | female | 450.00 | 512.31 |
| 106 | 7.00 | female | 383.00 | 505.58 |
| 107 | 7.00 | female | 405.00 | 507.79 |
| 108 | 7.00 | female | 358.50 | 503.12 |
| 109 | 7.00 | female | 432.50 | 510.55 |
| 110 | 7.00 | female | 487.50 | 516.07 |
| 111 | 7.00 | male | 350.50 | 502.32 |
| 112 | 7.00 | male | 274.00 | 494.64 |
| 113 | 7.00 | male | 162.00 | 483.40 |
| 114 | 7.00 | male | 479.00 | 515.22 |
| 115 | 7.00 | male | 353.00 | 502.57 |
| 116 | 7.00 | male | 297.00 | 496.95 |
| 117 | 7.00 | female | 339.50 | 501.21 |
| 118 | 7.00 | male | 254.50 | 492.68 |
| 119 | 7.00 | male | 404.00 | 507.69 |
| 120 | 7.00 | male | 285.50 | 495.79 |
| 121 | 7.00 | male | 383.00 | 505.58 |
| 122 | 7.00 | male | 190.00 | 486.21 |
| 123 | 7.00 | male | 373.00 | 504.58 |
| 124 | 7.00 | male | 267.50 | 493.99 |
| 125 | 7.00 | male | 210.50 | 488.27 |
| 126 | 7.00 | male | 155.00 | 482.70 |
| 128 | 7.00 | male | 307.00 | 497.95 |
| 129 | 7.00 | female | 379.00 | 505.18 |
| 130 | 7.00 | female | 276.00 | 494.84 |
| 131 | 7.00 | male | 341.50 | 501.42 |
| 132 | 7.00 | male | 220.00 | 489.22 |
| 133 | 7.00 | female | 268.00 | 494.04 |
| 134 | 7.00 | female | 290.50 | 496.30 |
| 136 | 7.00 | male | 288.50 | 496.10 |
| 137 | 7.00 | female | 301.00 | 497.35 |
| 138 | 7.00 | male | 185.00 | 485.71 |
| 139 | 7.00 | male | 283.00 | 495.54 |
| 140 | 7.00 | female | 265.00 | 493.74 |
| 141 | 7.00 | female | 416.50 | 508.94 |
| 142 | 7.00 | female | 320.00 | 499.26 |
| 143 | 7.00 | male | 316.00 | 498.86 |
| 144 | 7.00 | male | 312.50 | 498.50 |
| 145 | 7.00 | male | 183.00 | 485.51 |
| 146 | 7.00 | male | 276.50 | 494.89 |
| 147 | 7.00 | male | 213.50 | 488.57 |
| 148 | 7.00 | female | 206.00 | 487.81 |
| 149 | 7.00 | female | 230.00 | 490.22 |
| 150 | 7.00 | female | 246.00 | 491.83 |
| 152 | 7.00 | male | 313.00 | 498.55 |
| 153 | 7.00 | female | 264.00 | 493.64 |
| 154 | 7.00 | male | 255.50 | 492.78 |
| 155 | 7.00 | female | 285.00 | 495.74 |
| 156 | 7.00 | male | 214.50 | 488.67 |
| 157 | 7.00 | female | 387.00 | 505.98 |
| 158 | 7.00 | female | 126.50 | 479.83 |
| 159 | 7.00 | female | 324.00 | 499.66 |
| 160 | 7.00 | female | 186.00 | 485.81 |
| 161 | 7.00 | male | 498.50 | 517.17 |
| 162 | 7.00 | male | 155.00 | 482.70 |
| 163 | 7.00 | female | 314.00 | 498.65 |
| 164 | 7.00 | female | 209.00 | 488.12 |
| 165 | 7.00 | male | 189.00 | 486.11 |
| 181 | 7.00 | female | 301.00 | 497.35 |
| 224 | 7.00 | female | 309.00 | 498.15 |
| 226 | 7.00 | female | 293.50 | 496.60 |
| 227 | 7.00 | male | 392.00 | 506.48 |
| 228 | 7.00 | male | 369.50 | 504.23 |
| 229 | 7.00 | female | 222.00 | 489.42 |
| 230 | 7.00 | female | 271.00 | 494.34 |
| 231 | 7.00 | female | 229.50 | 490.17 |
| 232 | 7.00 | female | 222.00 | 489.42 |
| 234 | 7.00 | female | 211.00 | 488.32 |
| 1 | 8.00 | male | 476.00 | 496.34 |
| 2 | 8.00 | female | 670.50 | 519.25 |
| 3 | 8.00 | female | 430.50 | 490.98 |
| 4 | 8.00 | male | 477.50 | 496.52 |
| 5 | 8.00 | female | 632.50 | 514.77 |
| 6 | 8.00 | female | 436.50 | 491.69 |
| 7 | 8.00 | male | 577.50 | 508.30 |
| 8 | 8.00 | female | 480.00 | 496.81 |
| 9 | 8.00 | male | 625.50 | 513.95 |
| 10 | 8.00 | female | 561.50 | 506.41 |
| 11 | 8.00 | female | 616.50 | 512.89 |
| 12 | 8.00 | female | 464.50 | 494.99 |
| 13 | 8.00 | female | 401.00 | 487.51 |
| 14 | 8.00 | female | 376.00 | 484.57 |
| 15 | 8.00 | male | 510.50 | 500.41 |
| 16 | 8.00 | female | 477.50 | 496.52 |
| 17 | 8.00 | female | 404.00 | 487.86 |
| 18 | 8.00 | male | 448.50 | 493.10 |
| 19 | 8.00 | male | 434.50 | 491.45 |
| 20 | 8.00 | female | 384.50 | 485.57 |
| 21 | 8.00 | male | 574.50 | 507.94 |
| 22 | 8.00 | female | 567.00 | 507.06 |
| 23 | 8.00 | female | 475.50 | 496.28 |
| 24 | 8.00 | male | 321.50 | 478.15 |
| 25 | 8.00 | female | 563.00 | 506.59 |
| 26 | 8.00 | male | 471.00 | 495.75 |
| 27 | 8.00 | female | 617.00 | 512.95 |
| 28 | 8.00 | female | 427.00 | 490.57 |
| 29 | 8.00 | female | 465.50 | 495.11 |
| 30 | 8.00 | female | 563.50 | 506.65 |
| 31 | 8.00 | female | 659.00 | 517.90 |
| 32 | 8.00 | male | 447.50 | 492.99 |
| 33 | 8.00 | female | 578.50 | 508.41 |
| 34 | 8.00 | male | 513.00 | 500.70 |
| 35 | 8.00 | male | 588.00 | 509.53 |
| 36 | 8.00 | male | 412.00 | 488.80 |
| 37 | 8.00 | female | 650.00 | 516.84 |
| 39 | 8.00 | male | 618.50 | 513.13 |
| 40 | 8.00 | male | 488.50 | 497.81 |
| 41 | 8.00 | female | 566.50 | 507.00 |
| 42 | 8.00 | female | 659.00 | 517.90 |
| 43 | 8.00 | female | 558.00 | 506.00 |
| 44 | 8.00 | male | 495.50 | 498.64 |
| 45 | 8.00 | male | 430.50 | 490.98 |
| 46 | 8.00 | male | 423.50 | 490.16 |
| 47 | 8.00 | female | 614.50 | 512.65 |
| 48 | 8.00 | male | 592.50 | 510.06 |
| 166 | 8.00 | male | 481.00 | 496.93 |
| 167 | 8.00 | female | 525.50 | 502.17 |
| 168 | 8.00 | male | 418.50 | 489.57 |
| 169 | 8.00 | female | 458.00 | 494.22 |
| 170 | 8.00 | female | 499.50 | 499.11 |
| 171 | 8.00 | male | 401.00 | 487.51 |
| 172 | 8.00 | male | 630.00 | 514.48 |
| 173 | 8.00 | male | 421.00 | 489.86 |
| 174 | 8.00 | male | 595.00 | 510.36 |
| 175 | 8.00 | male | 517.50 | 501.23 |
| 176 | 8.00 | male | 457.00 | 494.10 |
| 177 | 8.00 | female | 452.00 | 493.52 |
| 178 | 8.00 | female | 471.50 | 495.81 |
| 179 | 8.00 | female | 543.50 | 504.29 |
| 182 | 8.00 | male | 599.00 | 510.83 |
| 183 | 8.00 | male | 516.50 | 501.11 |
| 184 | 8.00 | female | 379.50 | 484.98 |
| 185 | 8.00 | female | 510.00 | 500.35 |
| 186 | 8.00 | female | 539.00 | 503.76 |
| 187 | 8.00 | female | 557.00 | 505.88 |
| 188 | 8.00 | male | 298.00 | 475.38 |
| 189 | 8.00 | male | 477.50 | 496.52 |
| 190 | 8.00 | male | 436.00 | 491.63 |
| 222 | 8.00 | male | 572.00 | 507.65 |
| 223 | 8.00 | female | 526.50 | 502.29 |
| 180 | 9.00 | male | 569.00 | 505.53 |
| 191 | 9.00 | female | 614.00 | 511.80 |
| 192 | 9.00 | female | 666.00 | 519.05 |
| 193 | 9.00 | female | 443.00 | 487.97 |
| 194 | 9.00 | female | 542.00 | 501.77 |
| 195 | 9.00 | female | 506.00 | 496.75 |
| 197 | 9.00 | female | 447.00 | 488.52 |
| 198 | 9.00 | female | 408.00 | 483.09 |
| 199 | 9.00 | male | 576.00 | 506.51 |
| 200 | 9.00 | male | 489.00 | 494.38 |
| 201 | 9.00 | male | 578.00 | 506.79 |
| 202 | 9.00 | female | 560.00 | 504.28 |
| 203 | 9.00 | female | 614.00 | 511.80 |
| 204 | 9.00 | female | 547.00 | 502.46 |
| 205 | 9.00 | female | 499.00 | 495.77 |
| 206 | 9.00 | female | 530.00 | 500.09 |
| 207 | 9.00 | female | 449.00 | 488.80 |
| 208 | 9.00 | female | 547.00 | 502.46 |
| 209 | 9.00 | male | 651.00 | 516.96 |
| 210 | 9.00 | female | 576.00 | 506.51 |
| 211 | 9.00 | male | 496.00 | 495.36 |
| 212 | 9.00 | female | 555.00 | 503.58 |
| 213 | 9.00 | female | 446.00 | 488.39 |
| 214 | 9.00 | male | 619.00 | 512.50 |
| 215 | 9.00 | male | 491.00 | 494.66 |
| 216 | 9.00 | male | 497.00 | 495.49 |
| 217 | 9.00 | female | 646.00 | 516.26 |
| 218 | 9.00 | male | 413.00 | 483.79 |
| 219 | 9.00 | male | 466.00 | 491.17 |
| 220 | 9.00 | female | 442.00 | 487.83 |
| 221 | 9.00 | male | 527.00 | 499.68 |

Note. missing value was substituted by multiple imputation using regression methods
